# Supplementary material for: In situ electrochemical metal (Co, Ni) oxide deposition on MoS2 nanosheets for highly efficient electrocatalytic water splitting
Source: Royal Society of Chemistry journal article supplement (doi:10.1039/d2nj05946k), 2023-01-01
Supplement: d2nj05946k1.pdf [file d2nj05946k1.pdf]

**In-situ Electrochemical Metal (Co, Ni) Oxide Deposition on MoS<sub>2</sub> Nanosheets for  
Highly Efficient Electrocatalytic Water Splitting**

Yueyao Zhong<sup>\*a</sup>, Shouzhi Wang<sup>b</sup>, Lei zhang<sup>b</sup>

a School of Materials Science and Engineering, Shandong Jianzhu University, Jinan,  
250100, P. R. China

E-mail: zhongyueyao123@163.com

b Institute of Novel Semiconductors, State Key Lab of Crystal Materials, Shandong  
University, Jinan, 250100, P. R. China

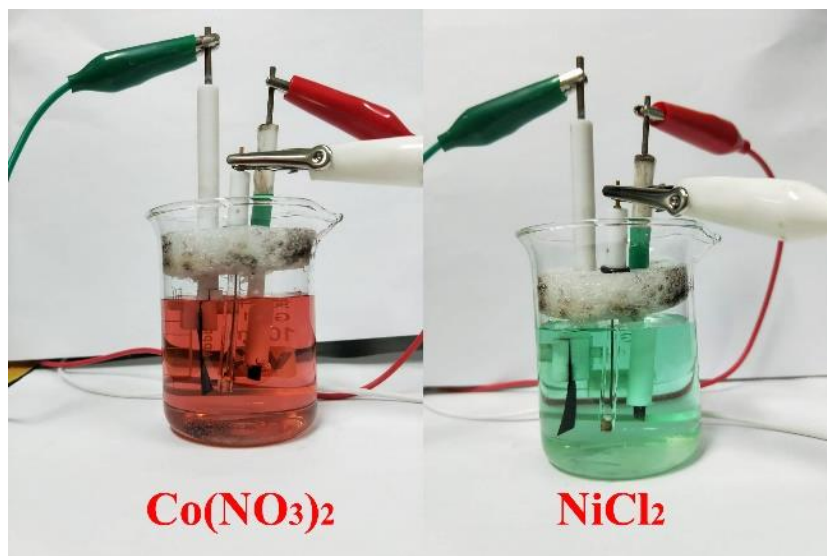

**Fig. S1** Preparation devices of Co/MoS<sub>2</sub>/CC and Ni/MoS<sub>2</sub>/CC.

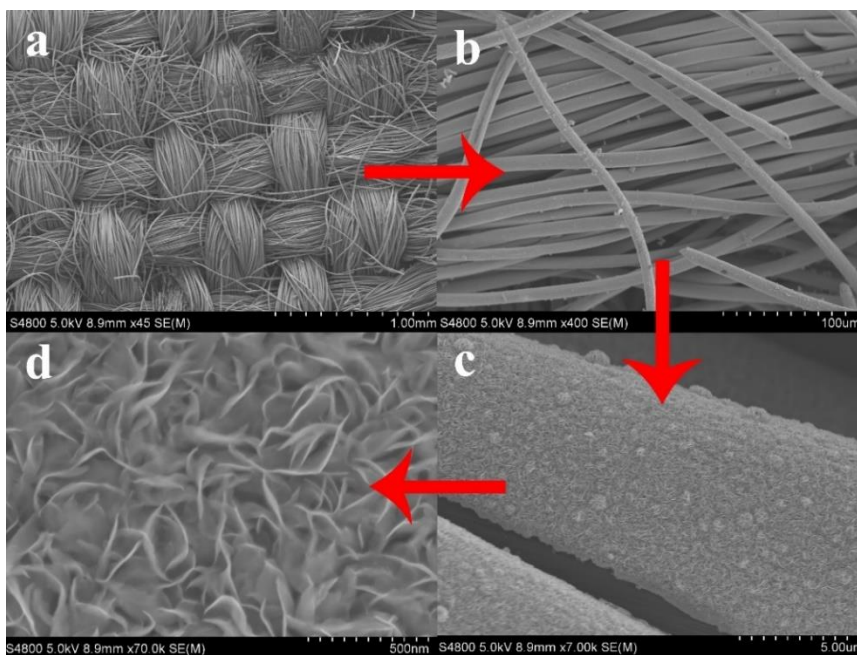

**Fig. S2** The SEM images of MoS<sub>2</sub>/CC with different magnifications.

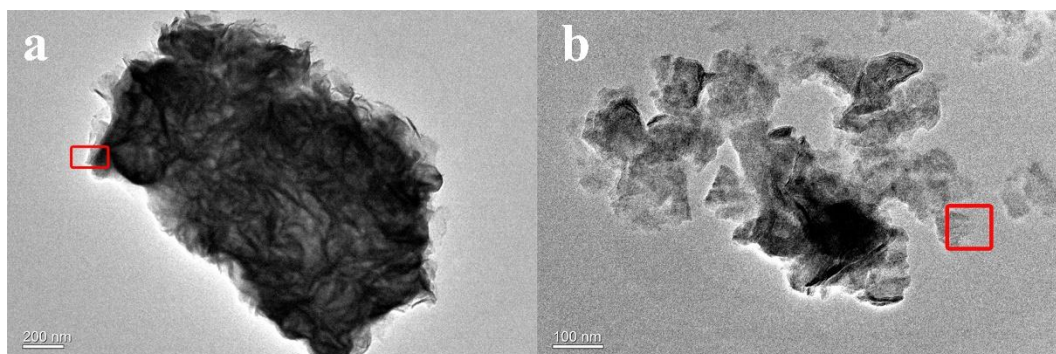

**Fig. S3** TEM images of (a) CoO/MoS<sub>2</sub>/CC, (b) NiO/MoS<sub>2</sub>/C.

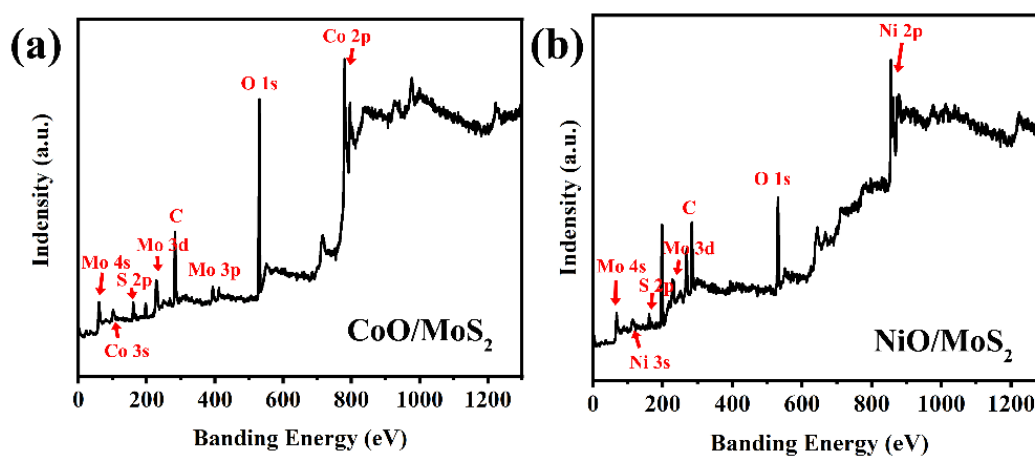

**Fig. S4** XPS survey spectra of (a) CoO/MoS<sub>2</sub>/CC and (b) NiO/MoS<sub>2</sub>/CC.

**Table S1** Comparison of the electrocatalytic performance of CoO/MoS<sub>2</sub>/CC for HER with that of reported bifunctional MoS<sub>2</sub>-based electrocatalysts tested under similar conditions.

|                                                      | Overpotential<br>for -10 mA<br>cm <sup>-2</sup> (mV) | Overpotential<br>for -100 mA<br>cm <sup>-2</sup> (mV) | Tafel slope<br>(mV dec <sup>-1</sup> ) | Ref.      |
|------------------------------------------------------|------------------------------------------------------|-------------------------------------------------------|----------------------------------------|-----------|
| CoO/MoS <sub>2</sub> /CC                             | 93                                                   | 162                                                   | 57.9                                   | This work |
| NiCo-MoS <sub>2</sub>                                | 70                                                   | ~                                                     | 38.1                                   | [1]       |
| Co <sub>3</sub> O <sub>4</sub> @MoO <sub>2</sub> /CC | 90                                                   | 220                                                   | 59.5                                   | [2]       |
| MoS <sub>2</sub> /FNS/FeNi<br>foam                   | 122                                                  | 300                                                   | 45.1                                   | [3]       |
| MoS <sub>2</sub> @NiOOH@C-<br>MC                     | 250                                                  | ~                                                     | 96                                     | [4]       |
| NiN@2M-MoS <sub>2</sub>                              | ~                                                    | 97                                                    | 43.2                                   | [5]       |

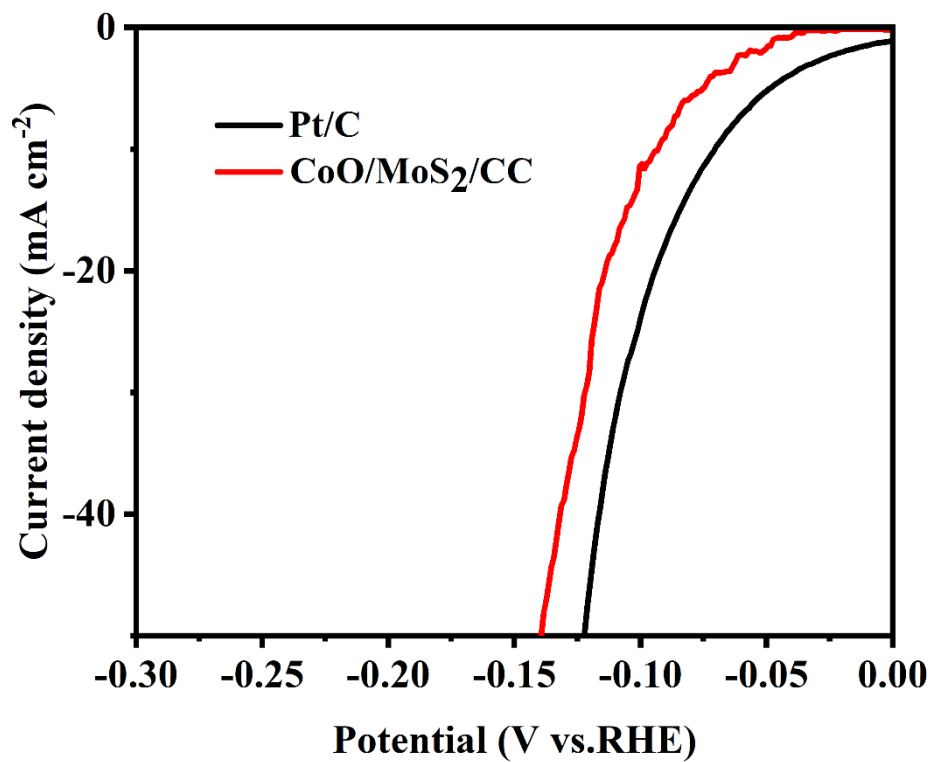

Fig. S5 Polarization curves of CoO/MoS<sub>2</sub>/CC and commercial 20 wt% Pt/C.

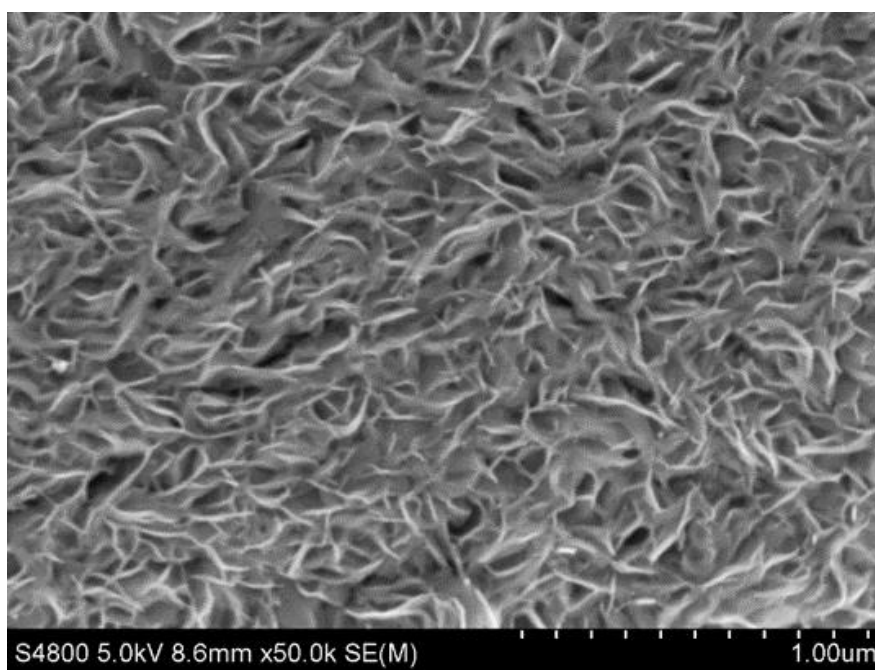

Fig. S6 SEM image of CoO/MoS<sub>2</sub>/CC after HER stability test carry out for 14 h.

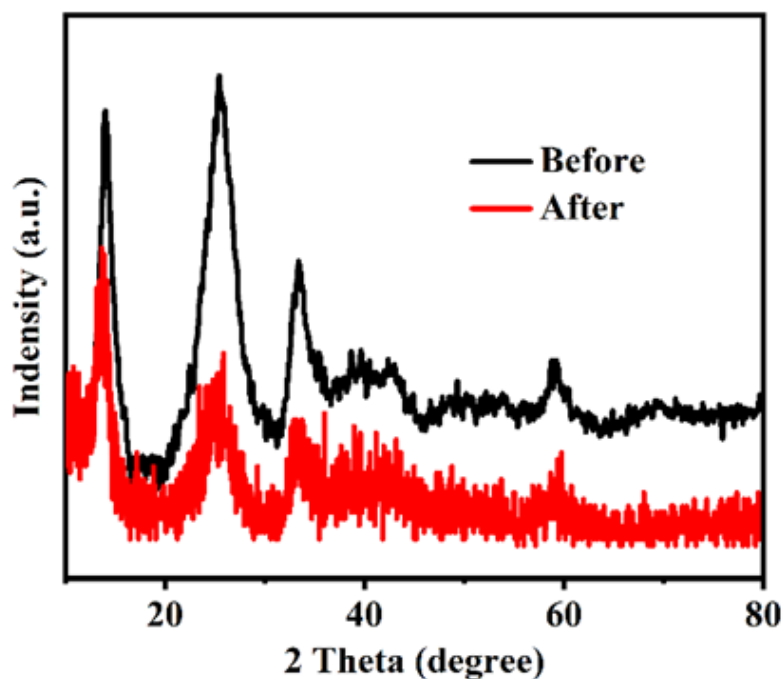

**Fig. S7** XRD patterns of CoO/MoS<sub>2</sub>/CC before and after HER stability test carry out for 14 h.

**Table S2** Comparison of the electrocatalytic performance of CoO/MoS<sub>2</sub>/CC for OER with that of reported bifunctional MoS<sub>2</sub>-based electrocatalysts tested under similar conditions.

| Samples                                              | Overpotential for 10 mA cm <sup>-2</sup> (mV) | Overpotential for 50 mA cm <sup>-2</sup> (mV) | Tafel slope (mV dec <sup>-1</sup> ) | Ref.      |
|------------------------------------------------------|-----------------------------------------------|-----------------------------------------------|-------------------------------------|-----------|
| CoO/MoS <sub>2</sub> /CC8                            | 210                                           | 450                                           | 282                                 | This work |
| NiCo-MoS <sub>2</sub>                                | 235                                           | 330                                           | 45.7                                | [1]       |
| Co <sub>3</sub> O <sub>4</sub> @MoO <sub>2</sub> /CC | 269                                           | ~                                             | 58                                  | [2]       |
| MoS <sub>2</sub> /FNS/FeNi foam                      | 204                                           | 210                                           | 28.6                                | [3]       |
| MoS <sub>2</sub> @NiOOH@C-MC                         | 280                                           | ~                                             | 113                                 | [4]       |
| NiN@2M-MoS <sub>2</sub>                              | ~                                             | 207                                           | 38.9                                | [5]       |

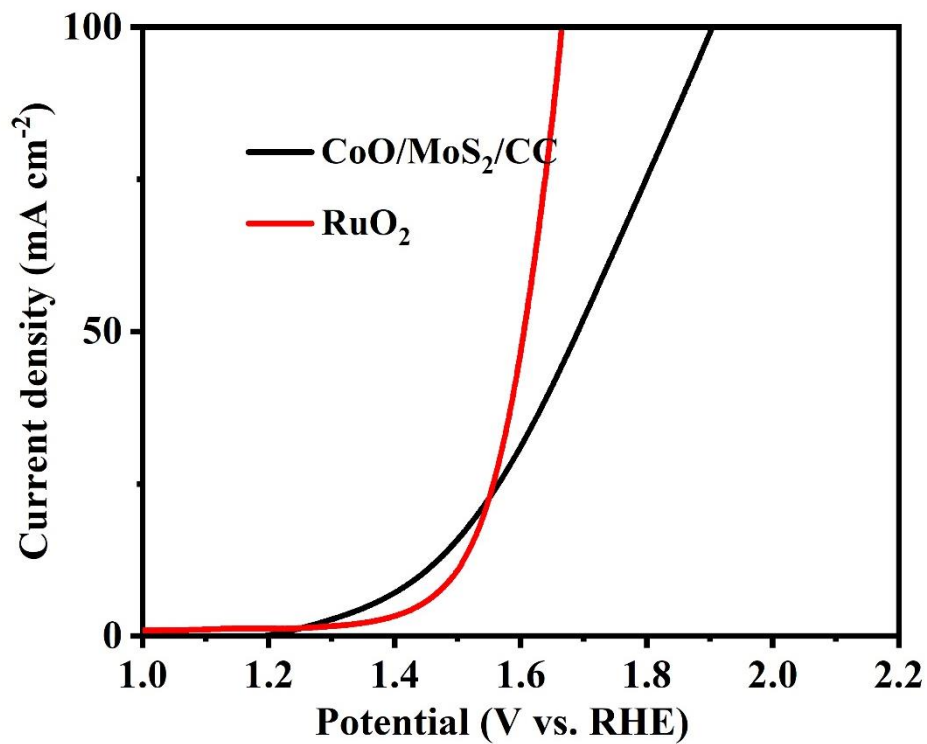

Fig. S8 Polarization curves of CoO/MoS<sub>2</sub>/CC and commercial RuO<sub>2</sub>.

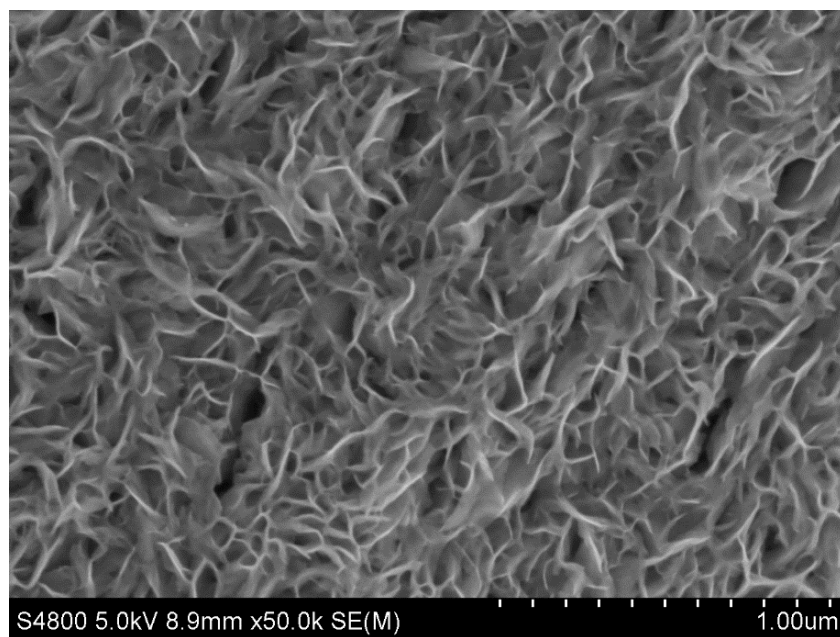

Fig. S9 SEM image of CoO/MoS<sub>2</sub>/CC after OER stability test carry out for 14 h.

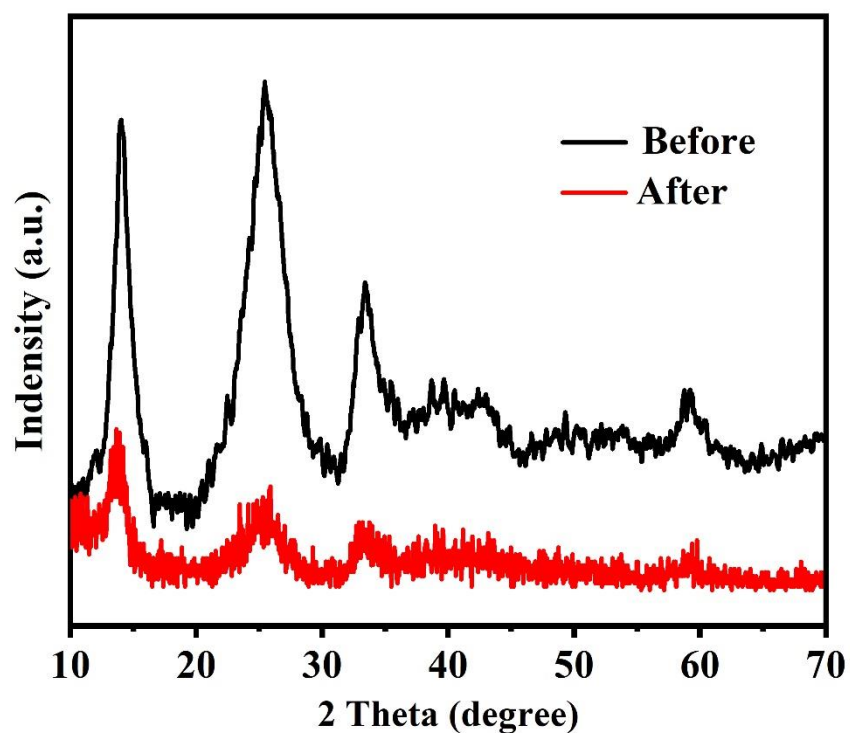

**Fig.S10** XRD patterns of CoO/MoS<sub>2</sub>/CC before and after OER stability test carry out for 14 h.

**Table S3** Comparison of the electrocatalytic performance of CoO/MoS<sub>2</sub>/CC for two-electrode overall water splitting with that of reported bifunctional MoS<sub>2</sub>-based electrocatalysts tested under similar conditions.

| Samples                                              | V <sub>10</sub> (V) | V <sub>20</sub> (V) | Durability test made                        | Ref.      |
|------------------------------------------------------|---------------------|---------------------|---------------------------------------------|-----------|
| CoO/MoS <sub>2</sub> /CC                             | 1.65                | 1.75                | 12 h @ 10 mA cm <sup>-2</sup><br>(1.65 V)   | This work |
| NiCo-MoS <sub>2</sub>                                | 1.48                | 1.58                | 24 h @ 10 mA cm <sup>-2</sup><br>(1.49 V)   | [1]       |
| Co <sub>3</sub> O <sub>4</sub> @MoO <sub>2</sub> /CC | 1.59                | 1.64                | 12 h @ 10 mA cm <sup>-2</sup><br>(1.65 V)   | [2]       |
| MoS <sub>2</sub> /FNS/FeNi<br>foam                   | 1.62                | 1.76                | 40 h @ 10 mA cm <sup>-2</sup><br>(1.62V)    | [3]       |
| NiN@2M-MoS <sub>2</sub>                              | 1.58                | 1.59                | 300 h @ 1000 mA cm <sup>-2</sup><br>(1.65V) | [5]       |

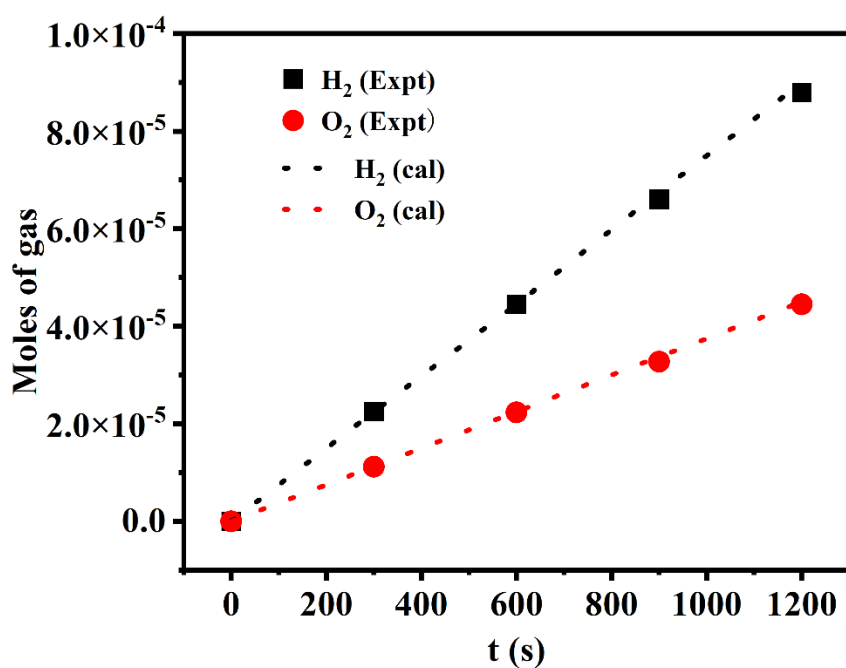

**Fig. S11** Faradic current efficiency for HER and OER of CoO/MoS<sub>2</sub>/CC electrode measured at 10 mA cm<sup>-2</sup> using conventional water displacement. The active electrode area of the cathode and anode was 1.5 cm<sup>2</sup>.

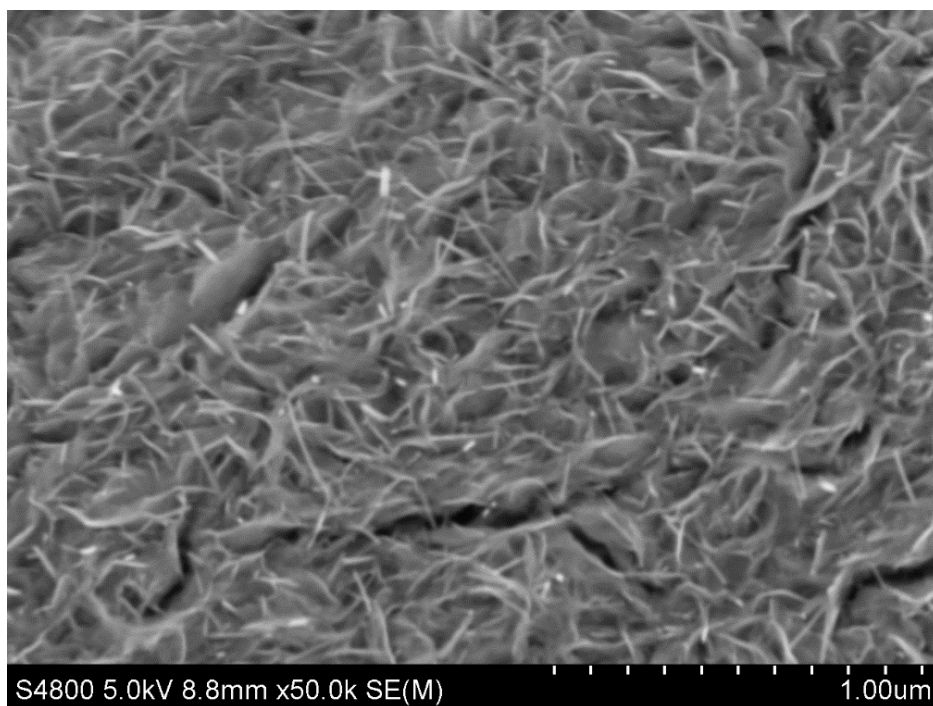

**Fig. S12** SEM image of CoO/MoS<sub>2</sub>/CC after 14 h chronopotentiometric curve test in a two-electrode configuration.



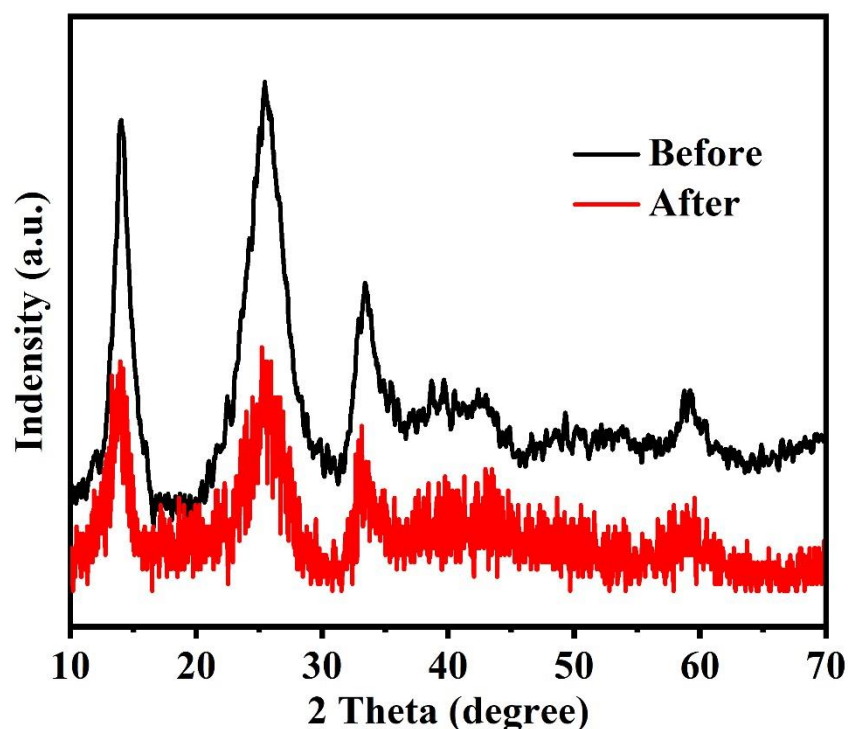

**Fig. S13** XRD patterns of CoO/MoS<sub>2</sub>/CC before and after 14 h chronopotentiometric curve test in a two-electrode configuration.

#### References:

- [1]. H. Li, S. Chen, X. Jia, B. Xu, H. Lin, H. Yang, L. Song, X. Wang, Amorphous nickel-cobalt complexes hybridized with 1T-phase molybdenum disulfide via hydrazine-induced phase transformation for water splitting, *Nat. Commun.* 2017, **8**, 15377.
- [2]. J. Liu, J. Wang, B. Zhang, Y. Ruan, H. Wan, X. Ji, K. Xu, D. Zha, L. Miao, J. Jiang, Mutually beneficial Co<sub>3</sub>O<sub>4</sub>@MoS<sub>2</sub> heterostructures as a highly efficient bifunctional catalyst for electrochemical overall water splitting, *J. Mater. Chem. A* 2018, **6**, 2067.
- [3]. Y. Wu, F. Li, W. Chen, Q. Xiang, Y. Ma, H. Zhu, P. Tao, C. Song, W. Shang, T. Deng, J. Wu, Coupling Interface Constructions of MoS<sub>2</sub>/Fe<sub>5</sub>Ni<sub>4</sub>S<sub>8</sub> Heterostructures for Efficient Electrochemical Water Splitting, *Adv. Mater.* 2018, **30**, 1803151.
- [4]. J. Liu, S. Zhao, C. Wang, Y. Ma, L. He, B. Liu, Z. Zhang, Catkin-derived mesoporous carbon-supported molybdenum disulfide and nickel hydroxyl oxide hybrid as a bifunctional electrocatalyst for driving overall water splitting, journal of colloid and interface science carbon support MoS<sub>2</sub> and NiOH bifunctional electrocatalyst, *J. Colloid Interf. Sci.* 2022, **608**, 1627.
- [5]. T. Wu, E. Song, S. Zhang, M. Luo, C. Zhao, W. Zhao, Ji. Liu, F. Huang, Engineering Metallic Heterostructure Based on Ni<sub>3</sub>N and 2M-MoS<sub>2</sub> for Alkaline Water Electrolysis with Industry-Compatible Current Density and Stability, *Adv. Mater.* 2022, **34**, 2108505.
